# Supplementary material for: Engineering the solid-state luminescence of organic crystals and cocrystals
Source: Royal Society of Chemistry journal article supplement (doi:10.1039/d3ma00853c), 2023-11-23
Supplement: d3ma00853c1.pdf [file d3ma00853c1.pdf]

## Electronic Supporting Information

### Engineering the Solid-State Luminescence of Organic Crystals and Cocrystals

Aijaz A. Dar,<sup>a\*</sup> Shaista H. Lone<sup>a</sup>, Ishtiyaq Ahmad<sup>a</sup>, Arshid A. Ganie<sup>a</sup>, Cherumannil Femina<sup>b</sup>

<sup>a</sup>Crystal Engineering Laboratory, Department of Chemistry, University of Kashmir, Hazratbal, Srinagar-190006, Jammu & Kashmir, India

<sup>b</sup>Department of Chemistry, Farook College P.O, Kozhikode 673632 Kerala India

**Figure ESI-1: FT-IR Spectrum of 1.**

**Figure ESI-2: FT-IR Spectrum of 2.**

**Figure ESI-3: FT-IR Spectrum of 3.**

**Figure ESI-4: PXRD and its simulated spectrum of 2.**

**Figure ESI-5: PXRD and its simulated spectrum of 3.**

**Figure ESI-6: Kubelka-Munk plots of reactants and product 1.**

**Figure ESI-7: Kubelka-Munk plots of reactants and product 2.**

**Figure ESI-8: Kubelka-Munk plots of reactants and product 3.**

**Figure ESI-9: Tauc plots of 1.**

**Figure ESI-10: Tauc plots of 2.**

**Figure ESI-11: Tauc plots of 3.**

**Figure ESI-12: Solid State Emission of 1a.**

**Figure ESI-13: Solid State Emission of 2a.**

**Figure ESI-14: Solid State Emission of 3a.**

**Figure ESI-15: Solid State Emission of 5-SSA .**

**Figure ESI-16: Solid State Emission of Product 1**

**Figure ESI-17: Solid State Emission of Product 2**

**Figure ESI-18: Solid State Emission of Product 3**

**Figure ESI-19: AIE in 1.**

**Figure ESI-20: AIE in 2.**

**Figure ESI-21: AIE in 3.**

**Figure ESI-22: DLS of 1.**

**Figure ESI-23: DLS of 2.**

**Figure ESI-24: DLS of 3.**

**Figure ESI-25: Picture of AIEgens in visible and UV light.**

**Figure ESI-26: 2-D hydrogen bonded network in 1.**

**Figure ESI-27: 3-D packing fragment of 2.**

**Figure ESI-28: Centrosymmetric  $R_2^2(10)$  synthon observed in 2.**

**Figure ESI-29: 3-Dimensional packing fragment of 3.**

**Figure ESI-30: Contribution of individual intermolecular interaction to overall packing of 1, 2, and 3 and their respective 1a, 2a and 3a Schiff bases.**

**Figure ESI-31: Hirshfeld surface b) Shape index c) Curvedness of 1.**

**Figure ESI-32: Total and individual fingerprint plots of 1.**

**Figure ESI-33: Hirshfeld surface b) Shape index c) Curvedness of 2.**

**Figure ESI-34: Total and individual fingerprint plots of 2.**

**Figure ESI-35: Hirshfeld surface b) Shape index c) Curvedness of 3.**

**Figure ESI-36: Total and individual fingerprint plots of 3.**

**Table ESI-1: Crystallographic table of 1-3.**

**Table ESI-2. Comparative parameters of solution and solid-state emission of 1a-3a and 1-3.**

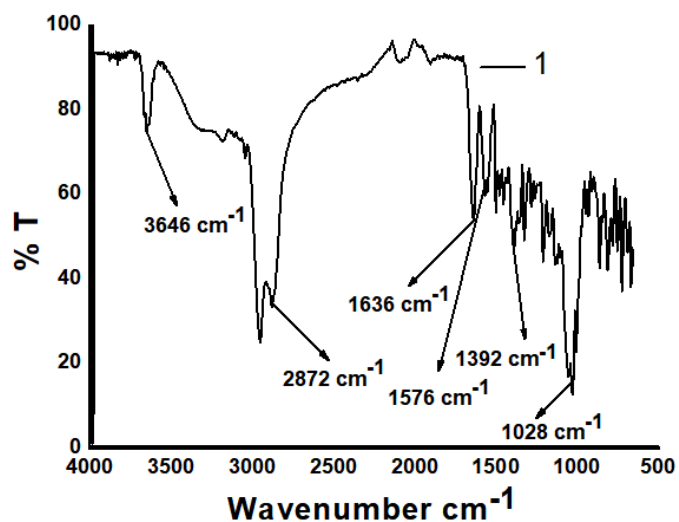

Figure ESI-1: FT-IR Spectrum of 1.

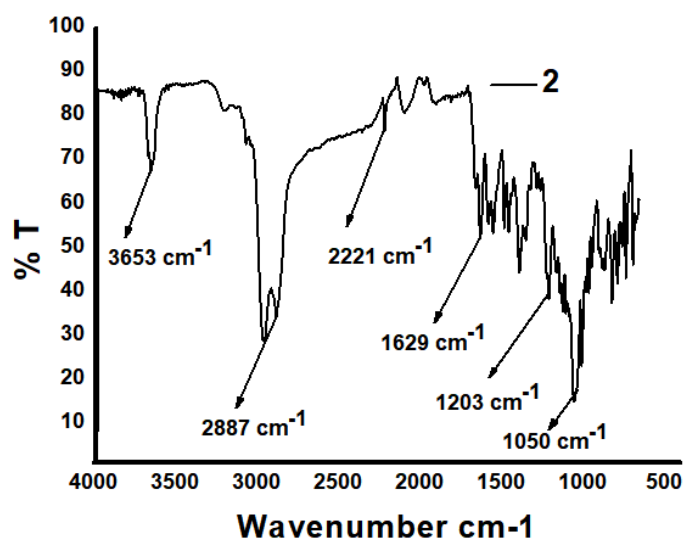

Figure ESI-2: FT-IR Spectrum of 2.

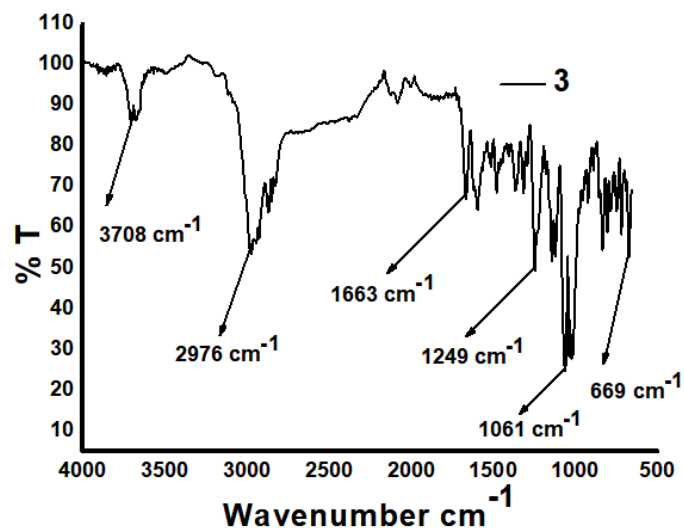

Figure ESI-3: FT-IR Spectrum of 3.

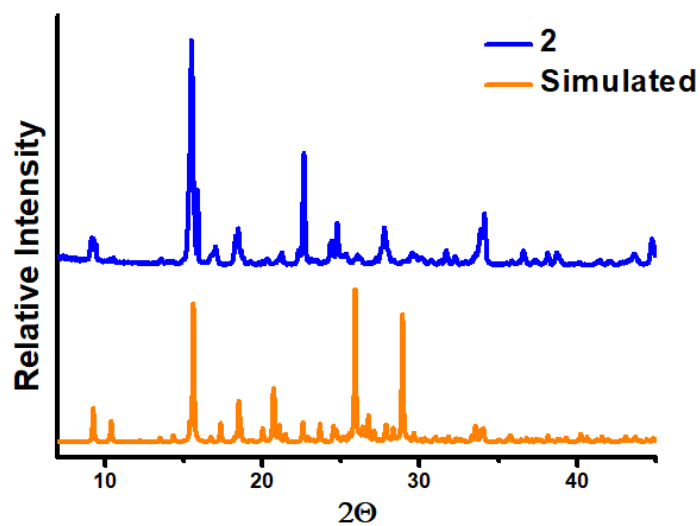

Figure ESI-4: PXRD and its simulated spectrum of 2

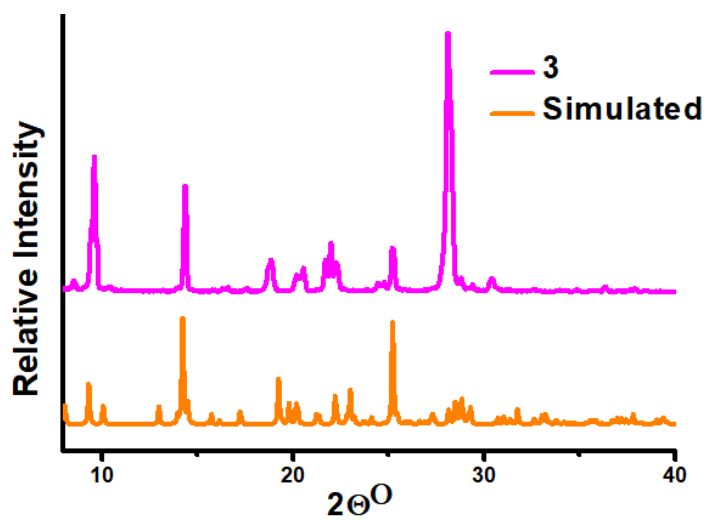

Figure ESI-5: PXRD and its simulated spectrum of 3.

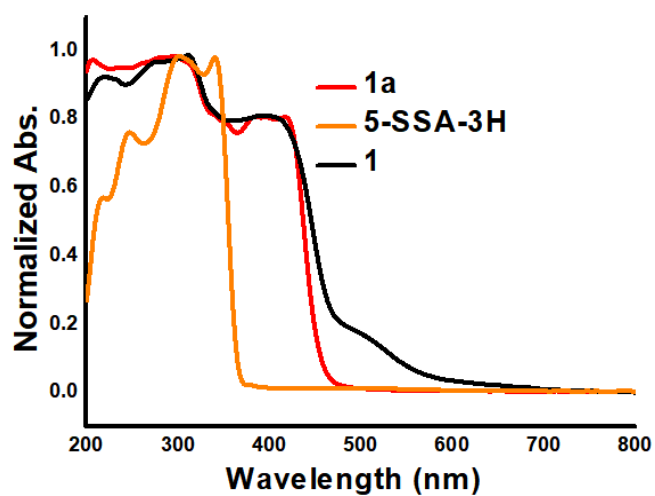

Figure ESI-6: Kubelka-Munk plots of reactants and product 1.

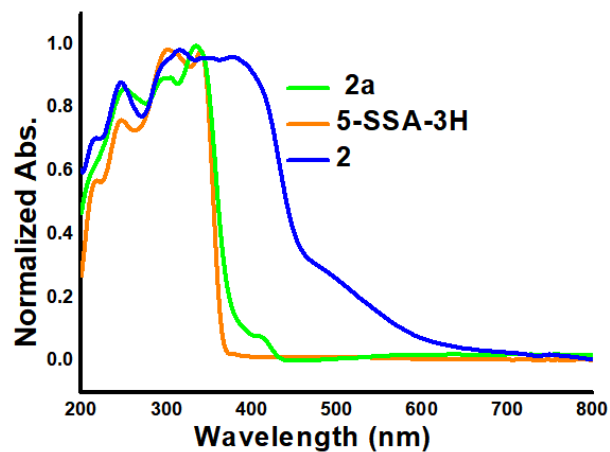

Figure ESI-7: Kubelka-Munk plots of reactants and product 2.

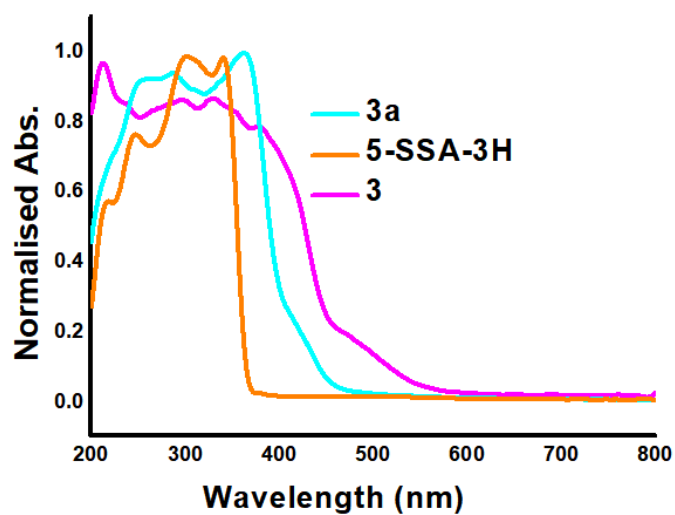

Figure ESI-8: Kubelka-Munk plots of reactants and product 3.

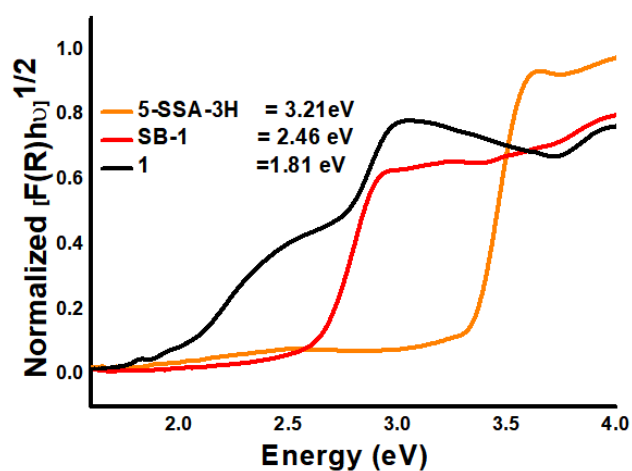

Figure ESI-9: Tauc plots of 1

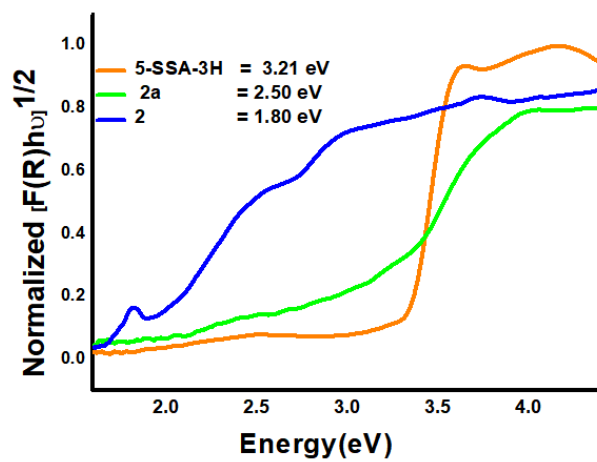

Figure ESI-10:Tauc plots of 2

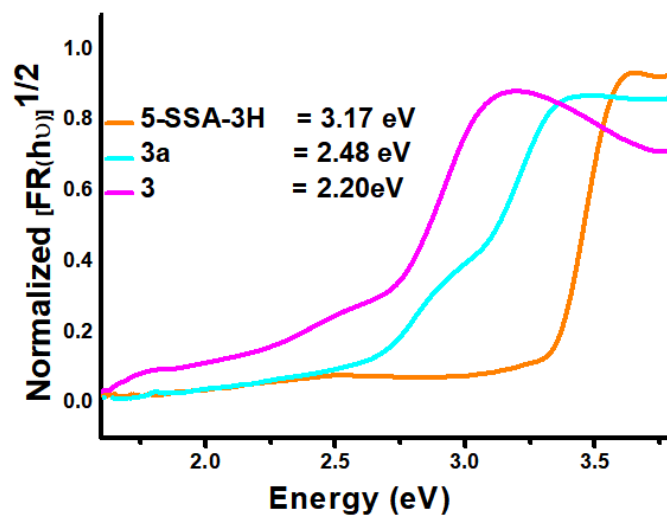

Figure ESI-11:- Tauc plots of 3

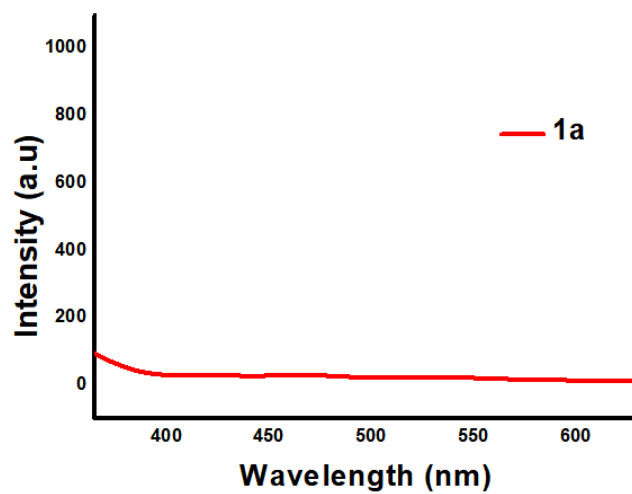

Figure ESI-12: Solid State Emission of 1a.

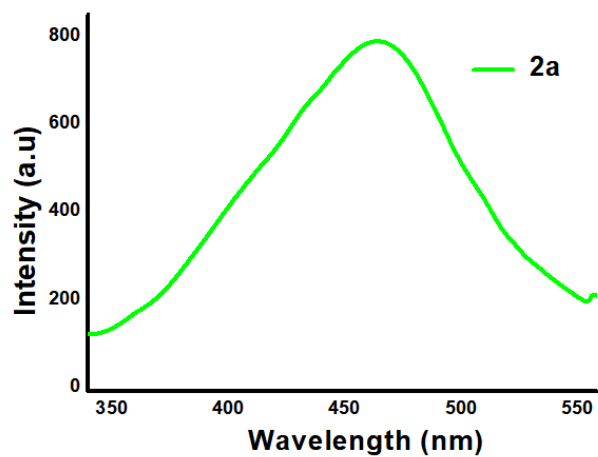

Figure ESI-13: Solid State Emission of 2a

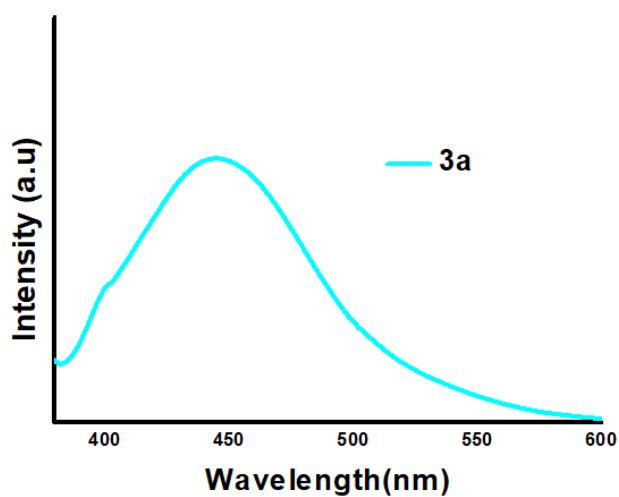

Figure ESI-14: Solid State Emission of 3a.

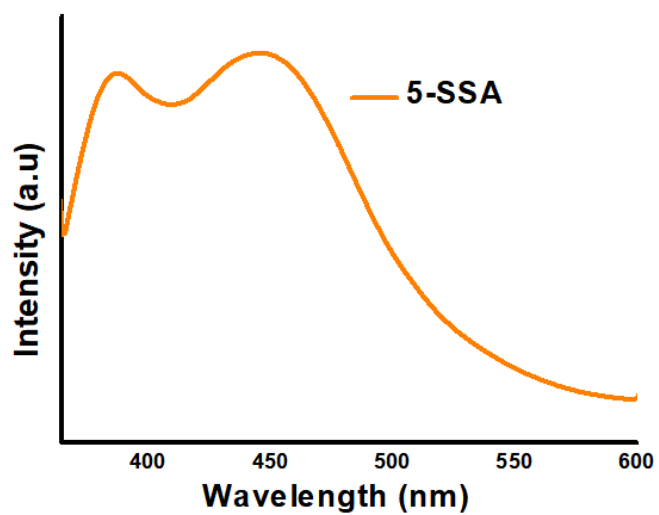

Figure ESI-15: Solid State Emission of 5-SSA

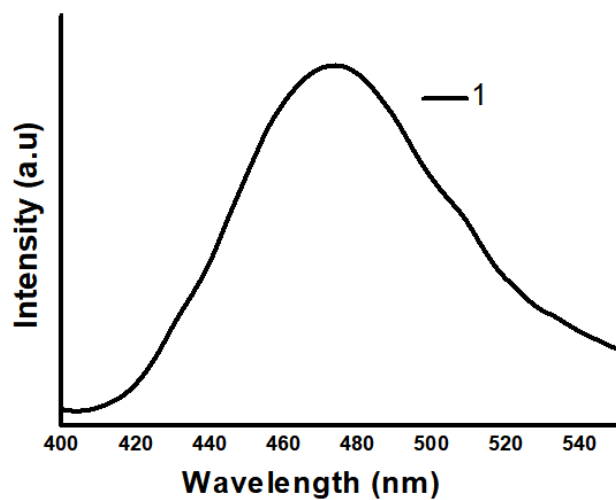

Figure ESI-16: Solid State Emission of Product 1

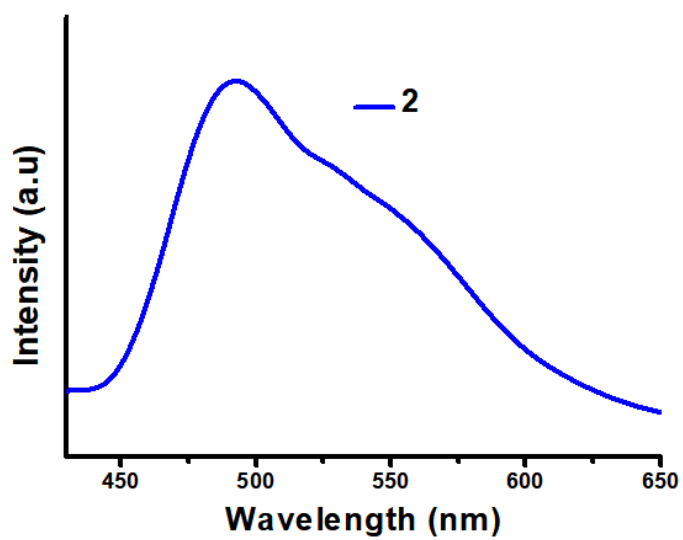

Figure ESI-21: Solid State Emission of product 2

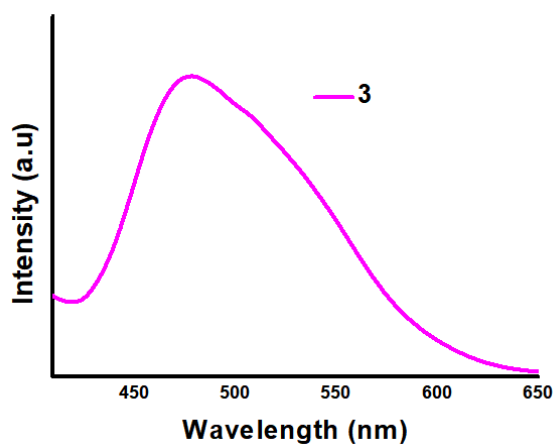

Figure ESI-18: Solid State Emission of Product

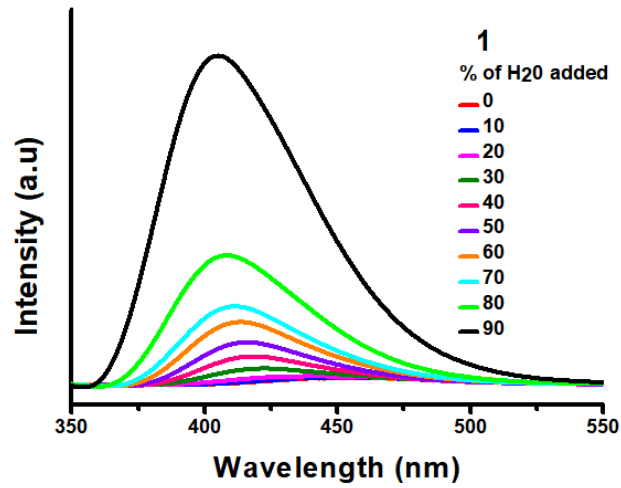

Figure ESI-19: AIE in 1.

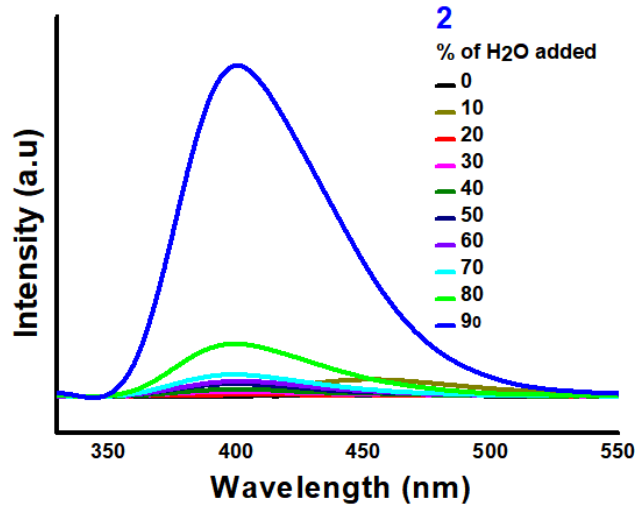

Figure ESI-20: AIE in 2.

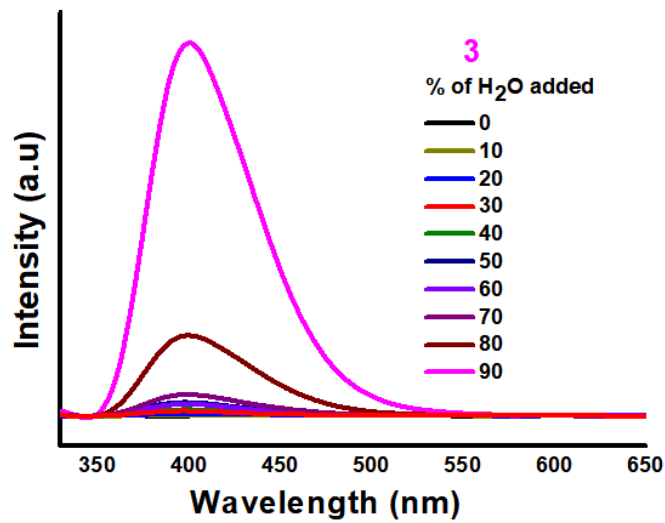

Figure ESI-21: AIE in 3.



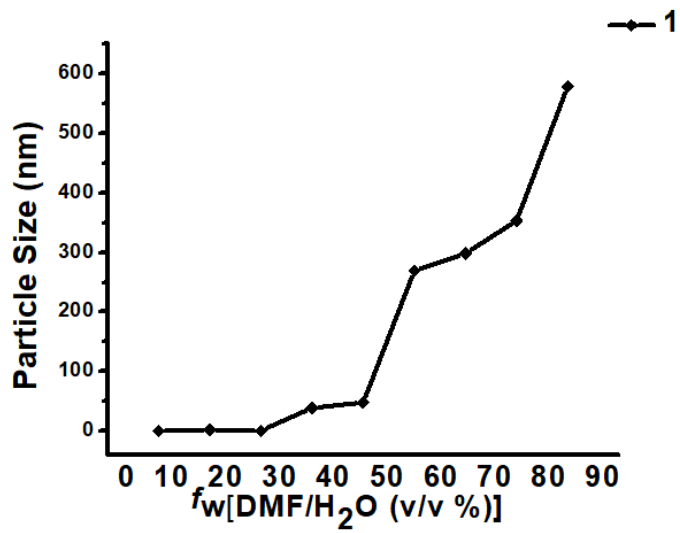

Figure ESI-22: DLS of 1

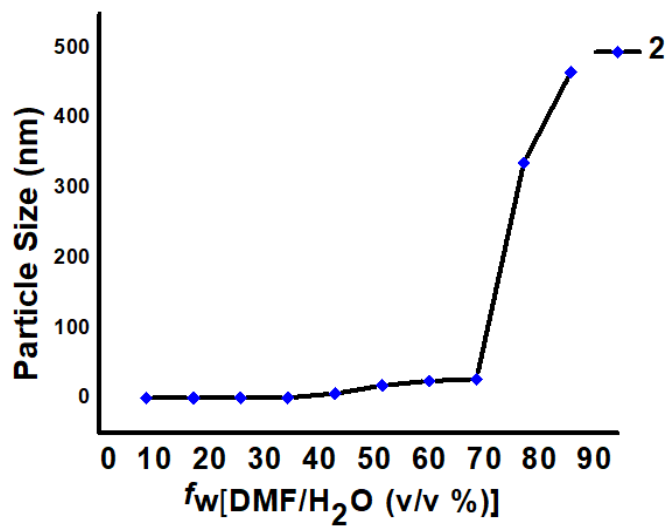

Figure ESI-23: DLS of 2

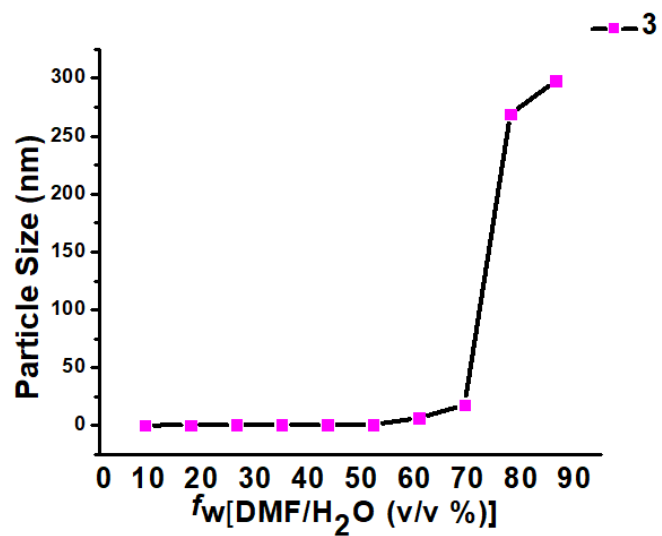

Figure ESI-24: DLS of 3

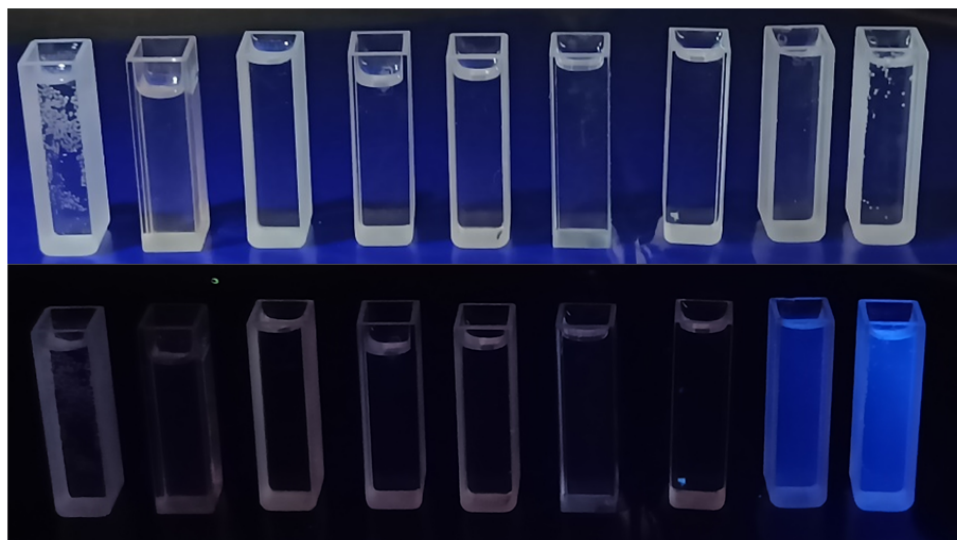

**Figure ESI-25: Picture of AIEgens in visible and UVlight**

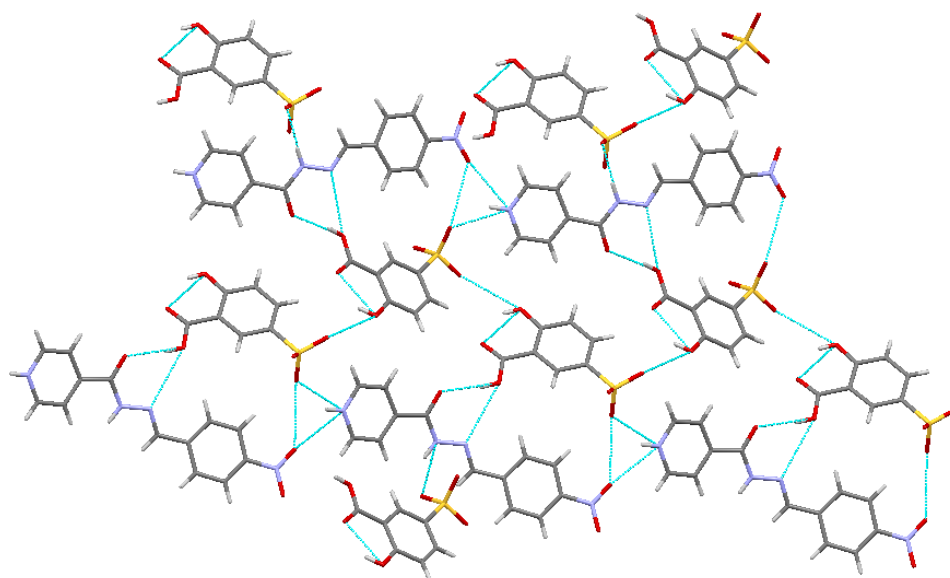

**Figure ESI-26: 2-D hydrogen bonded network in 1.**

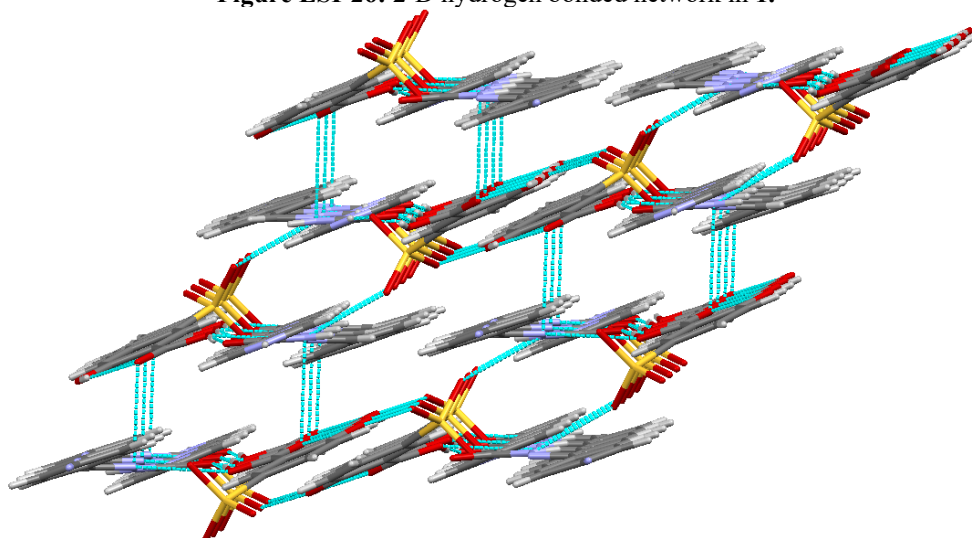

**Figure ESI-27: 3-D packing fragment of 2.**

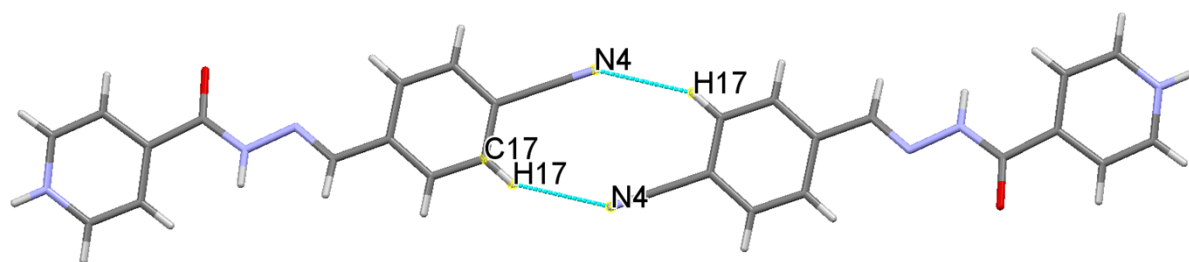

Figure ESI-28: Centrosymmetric  $R_2^2(10)$  synthon observed in **2**.

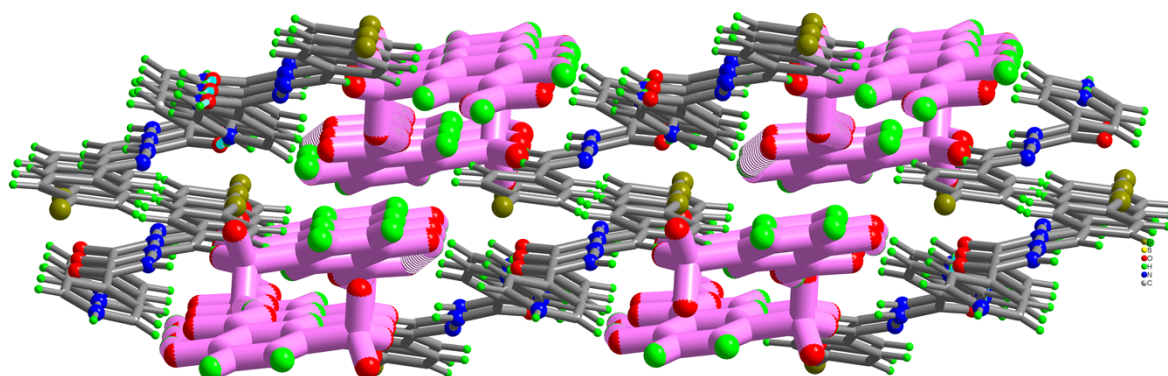

Figure ESI-29: 3-Dimensional packing fragment of **3**.

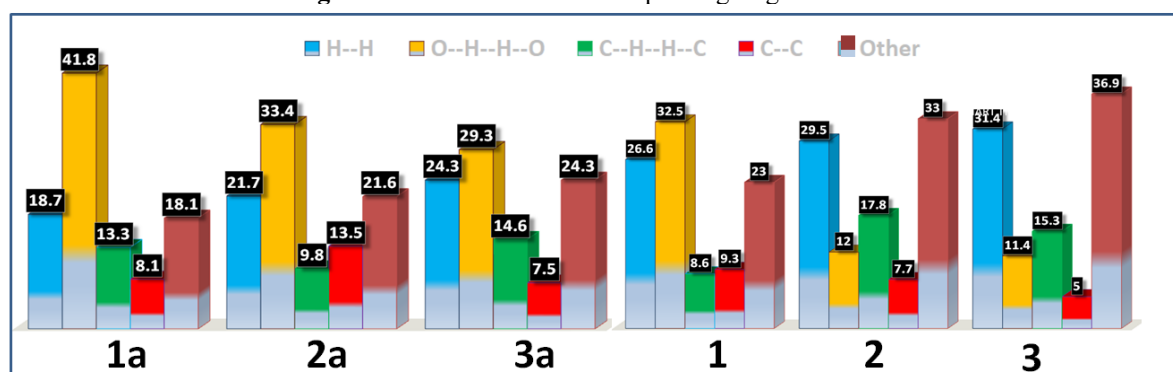

Figure ESI-30: Contribution of individual intermolecular interaction to overall packing of **1**, **2**, and **3** and their respective **1a**, **2a** and **3a** Schiff bases.

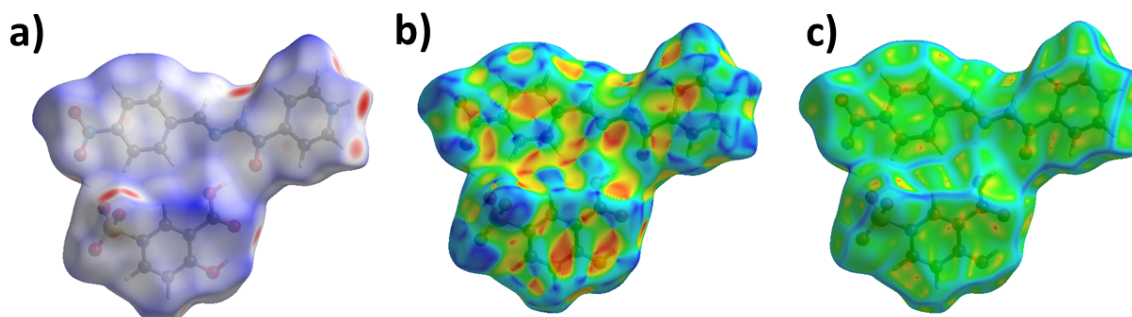

Figure ESI-31: Hirshfeld surface b) Shape index c) Curvedness of 1.

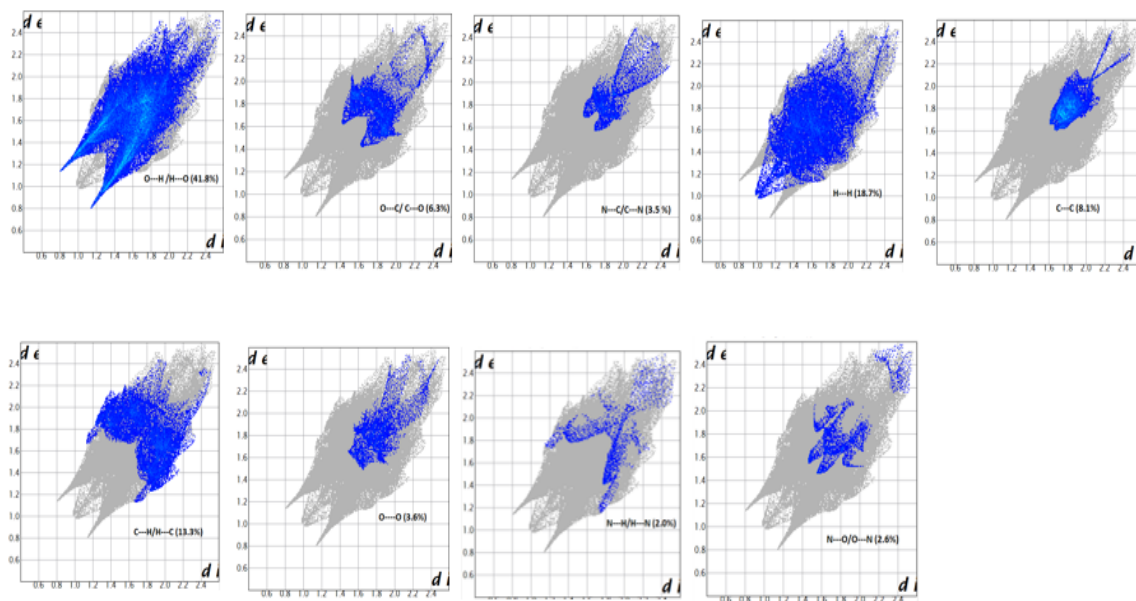

Figure ESI-32: Total and individual fingerprint plots of 1

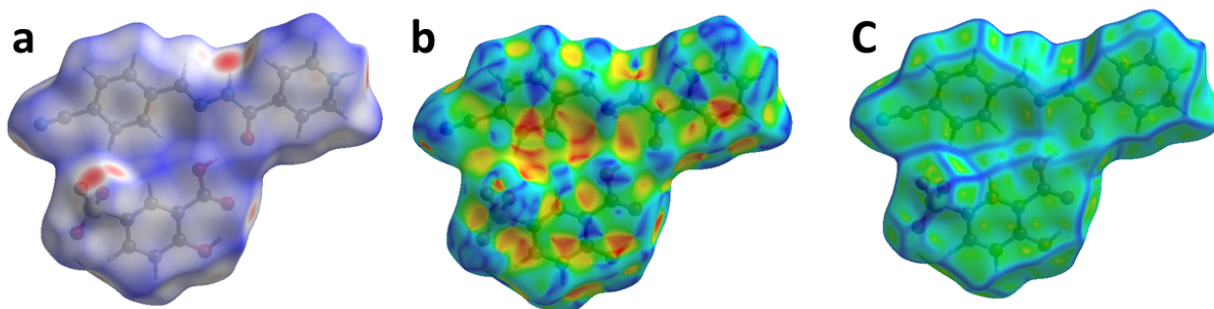

Figure ESI-33: Hirshfeld surface b) Shape index c) Curvedness of 2.

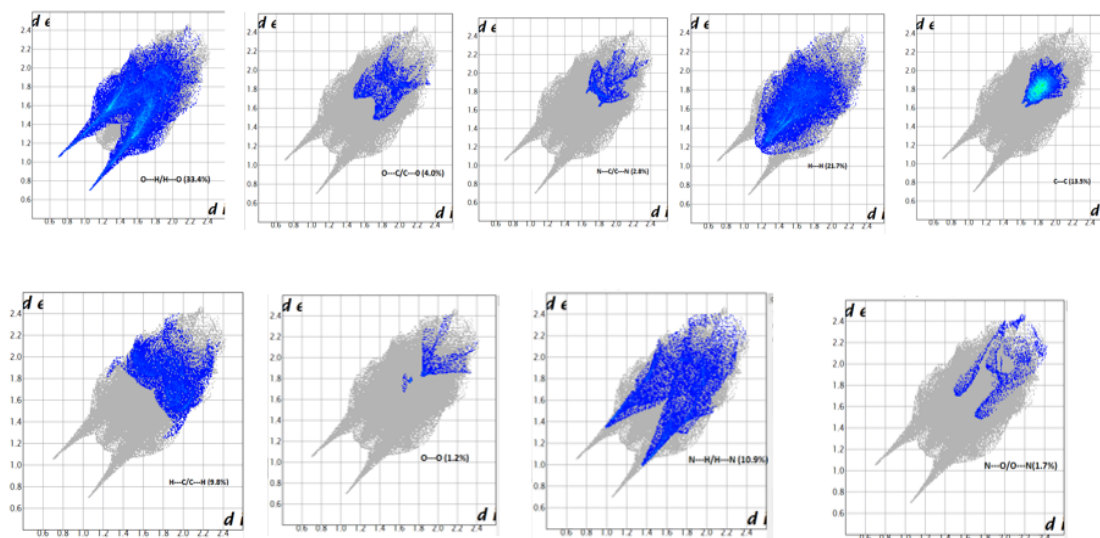

Figure ESI-34: Total and individual fingerprint plots of 2.

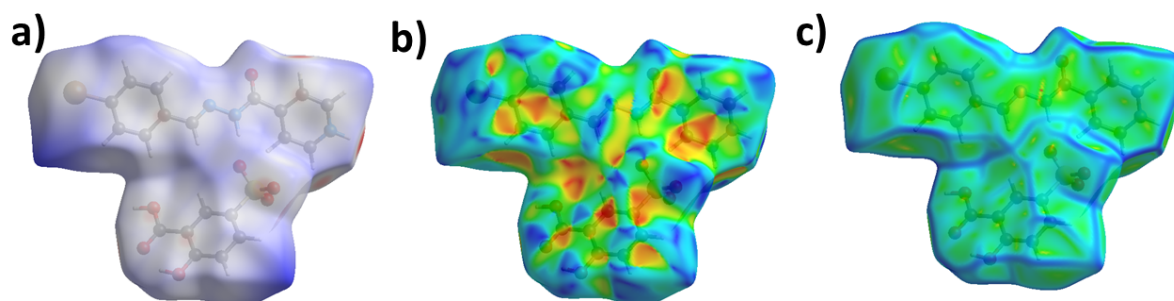

Figure ESI-35: Hirshfeld surface b) Shape index c) Curvedness of 3

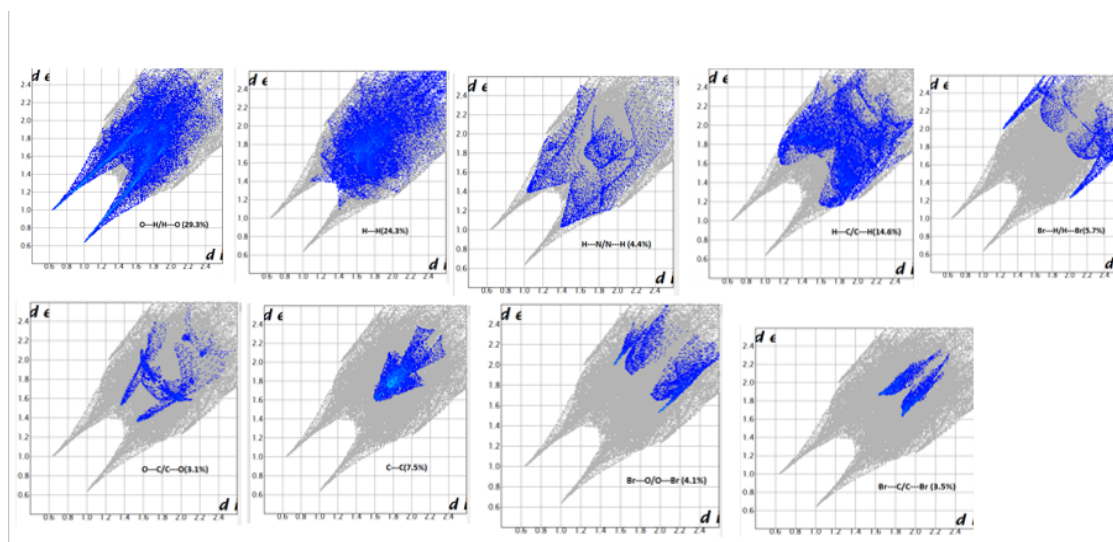

Figure ESI-36: Total and individual fingerprint plots of 3..

Table ESI-1: Crystallographic table of 1-3.

| Compound          | 1                                                               | 2                                                               | 3                                                               |
|-------------------|-----------------------------------------------------------------|-----------------------------------------------------------------|-----------------------------------------------------------------|
| Reaction Number   | SHL-09                                                          | SHL-10                                                          | SHL-31                                                          |
| CCDC no.          | 2255995                                                         | 2255996                                                         | 2255997                                                         |
| Empirical formula | C <sub>20</sub> H <sub>16</sub> N <sub>4</sub> O <sub>9</sub> S | C <sub>21</sub> H <sub>16</sub> N <sub>4</sub> O <sub>7</sub> S | C <sub>20</sub> H <sub>16</sub> N <sub>4</sub> O <sub>9</sub> S |
| fw                | 488.43                                                          | 468.44                                                          | 522.32                                                          |
| Temp [K]          | 293                                                             | 293                                                             | 293                                                             |
| Crystal system    | Orthorhombic                                                    | Monoclinic                                                      | Monoclinic                                                      |

|                                |             |             |             |
|--------------------------------|-------------|-------------|-------------|
| Space group                    | P 21 21 21  | P 21/n      | P 21/c      |
| a, [Å]                         | 10.7818(7)  | 10.3934(6)  | 12.189(2)   |
| b, [Å]                         | 12.1565(11) | 15.5510(5)  | 14.7571(12) |
| c, [Å]                         | 15.1497(10) | 12.4041(4)  | 13.783(3)   |
| $\alpha$ , [deg]               | 90.00       | 90.00       | 90.00       |
| $\beta$ , [deg]                | 90.00       | 99.762(4)   | 115.79(2)   |
| $\gamma$ , [deg]               | 90.00       | 90.00       | 90.00       |
| V, [Å <sup>3</sup> ]           | 1985.7(3)   | 1975.82(15) | 2232.3(7)   |
| Z                              | 4           | 4           | 4           |
| D(calcd) [Mg/cm <sup>3</sup> ] | 1.634       | 1.575       | 1.554       |
| $\mu$ [mm <sup>-1</sup> ]      | 0.230       | 0.221       | 1.982       |
| $\Theta$ range [°]             | 24.991      | 24.999      | 66.727      |
| Reflns collected               | 3125        | 3461        | 3008        |
| Indep. reflns                  | 2802        | 3461        | 2562        |
| GOF                            | 1.062       | 1.072       | 1.451       |
| R1 (I0 > 2 $\sigma$ (I0))      | 0.0642      | 0.0472      | 0.1003      |
| wR2 (all data)                 | 0.1749      | 0.1340      | 0.3290      |

**Table ESI-2. Comparative parameters of solution and solid-state emission of 1a-3a and 1-3.**

| Compound  | Solution phase       |                     |                     |            | Solid phase          |                     |                     |            |
|-----------|----------------------|---------------------|---------------------|------------|----------------------|---------------------|---------------------|------------|
|           | $\lambda_{abs}$ [nm] | $\lambda_{ex}$ [nm] | $\lambda_{em}$ [nm] | $\Phi$ (%) | $\lambda_{abs}$ [nm] | $\lambda_{ex}$ [nm] | $\lambda_{em}$ [nm] | $\Phi$ (%) |
| <b>1a</b> | 320                  | 300                 | 380                 | 18.11      | 490                  |                     | 0.00                | 0.00       |
| <b>2a</b> | 300                  | 300                 | 400                 | 10.21      | 380                  | 320                 | 464                 | 0.10       |
| <b>3a</b> | 305                  | 300                 | 470                 | 36.31      | 410                  | 320                 | 442                 | 0.07       |
| <b>1</b>  | 295                  | 300                 | 420                 | 81.22      | 470                  | 320                 | 467                 | 0.14       |
| <b>2</b>  | 304                  | 300                 | 425                 | 60.14      | 430                  | 320                 | 472                 | 0.13       |
| <b>3</b>  | 302                  | 300                 | 418                 | 53.42      | 405                  | 320                 | 484                 | 0.12       |
